# Supplementary material
Source: PubMed Central journal article supplement (PMC7807386)
Supplement: jamasurg-e205672-s001.pdf [file jamasurg-e205672-s001.pdf]

# CROSSFIRE STUDY PROTOCOL

|    |                                                     |    |
|----|-----------------------------------------------------|----|
| 1  |                                                     |    |
| 2  | <b>Contents</b>                                     |    |
| 3  | 1. Study title                                      | 2  |
| 4  | 2. Project summary                                  | 2  |
| 5  | 3. Study identification                             | 3  |
| 6  | 4. Sponsor                                          | 3  |
| 7  | 5. Administering institution                        | 3  |
| 8  | 6. Investigators and participating institutions     | 3  |
| 9  | 7. Rationale and background information             | 5  |
| 10 | 8. Study hypothesis                                 | 7  |
| 11 | 9. Aims                                             | 8  |
| 12 | 10. Study design                                    | 8  |
| 13 | 11. Methods                                         | 8  |
| 14 | 12. Safety considerations                           | 15 |
| 15 | 13. Data management                                 | 15 |
| 16 | 14. Ethical considerations                          | 16 |
| 17 | 15. Peer review                                     | 16 |
| 18 | 16. Feasibility                                     | 17 |
| 19 | 17. Expected outcomes                               | 17 |
| 20 | 18. Dissemination of results and publication policy | 17 |
| 21 | 19. Duration of the project                         | 18 |
| 22 | 20. Anticipated problems                            | 19 |
| 23 | 21. Project management                              | 19 |
| 24 | 22. References                                      | 20 |
| 25 |                                                     |    |

26 **1. Study title**

27 A Combined Randomised and Observational Study of Surgery for Fractures In the distal  
28 Radius in the Elderly (CROSSFIRE).

29 **2. Project summary**

30 Fractures of the distal radius are the most common fractures presenting to emergency  
31 departments and orthopaedic surgeons.(1) These fractures are more common in the elderly  
32 (due to osteoporosis and increased risk of falls) and the incidence in this age group is  
33 increasing.(1) Considerable practice variation exists in the management of distal radius  
34 fractures in the elderly in Australia,(2) ranging from closed reduction (manipulation of the  
35 arm to realign the fracture) with cast immobilisation, to open reduction (surgical exposure  
36 and realignment of the fracture) with plate fixation. Open reduction and (volar locking) plate  
37 fixation is currently the most common treatment provided. While there is evidence showing  
38 no significant advantage for some forms of surgical fixation over closed treatment, and no  
39 difference between different surgical techniques,[3-15] there is a lack of evidence  
40 comparing the two most common treatments used in Australia: volar locked plate fixation  
41 versus cast immobilisation. Surgical management of these fractures involves significant  
42 costs (implant costs, medical costs, hospital costs) and risks (infection, implant failure,  
43 general surgical risks) compared to non-operative management (closed reduction and cast  
44 immobilisation in the emergency department). Therefore, high level evidence comparing the  
45 current treatment alternatives (plate fixation versus casting) is required in order to address  
46 practice variation, justify or avoid costs, and to provide the best clinical outcome for patients  
47 with these common fractures.

48 This pragmatic, multicentre randomised comparative effectiveness trial aims to determine  
49 whether (volar locking) plate fixation leads to better pain and function and is more cost-  
50 effective than closed reduction with cast immobilisation in displaced distal radius fractures in  
51 adults aged 60 years and older. The trial will compare the two techniques, but will also  
52 follow patients that are unwilling to be randomised (but consent to follow up) in a separate,  
53 observational arm. Inclusion of non-randomised patients provides a more complete  
54 spectrum of fracture presentation, provides practice and outcome insights about standard  
55 care, and improves the generalisation of the results from the randomised arms.

56 Given that plate fixation requires hospital admission and surgery, and that closed reduction  
57 with cast immobilisation is usually performed in the emergency department without  
58 admission, the findings have important implications for use of resources (theatre time, bed  
59 days, staff and implant costs) and may also reduce harms associated with plate fixation  
60 (infection, implant mal-positioning, tendon rupture and reoperation for implant removal). This

61 trial will have significance in Australia, New Zealand and internationally, as it will address an  
62 important need for evidence supporting surgical practice.

### 63 **3. Study identification**

64 Registered with a World Health Organisation Universal Trial Number (WHO UTN).

65 Registered with ANZCTR (Australian and New Zealand Clinical Trials Registry).

66 WHO UTN: U1111-1186-3557

67 ANZCTR number: ACTRN12616000969460

68 Web address: <http://www.ANZCTR.org.au/ACTRN12616000969460.aspx>

69 Date submitted: 12 July 2016

70 Date registered: 22 July 2016

71 Registered by: Ian Harris and Andrew Lawson

### 72 **4. Sponsor**

73 Whitlam Orthopaedic Research Centre, Ingham Institute for Applied Medical Research,  
74 UNSW Australia.

75 Grant funding has been received from NHMRC Project Grant (2016, APP1098550), the  
76 Australian Orthopaedic Association Research Foundation, AO Trauma Asia Pacific and The  
77 Lincoln Foundation..

### 78 **5. Administering institution**

79 Whitlam Orthopaedic Research Centre, Ingham Institute for Applied Medical Research,  
80 UNSW Australia

81 Street address: Level 2, 1 Campbell St, Liverpool, 2170, NSW, Australia

82 Postal address: Locked Bag 7103, Liverpool BC 1871, NSW, Australia

83 Telephone: +61 2 8738 9254

84 Facsimile: +61 2 9602 7187

85 Website: [www.worc.org.au](http://www.worc.org.au)

### 86 **6. Investigators and participating institutions**

87 The following investigators comprise the CROSSFIRE Study Group

88 Prof Ian Harris Liverpool Hospital / Whitlam Orthopaedic Research Centre

89 A/Prof Justine Naylor Whitlam Orthopaedic Research Centre

90 Dr Rajat Mittal Whitlam Orthopaedic Research Centre

|     |                          |                                                         |
|-----|--------------------------|---------------------------------------------------------|
| 91  | Andrew Lawson            | Whitlam Orthopaedic Research Centre (Project manager)   |
| 92  | Prof Rachelle Buchbinder | Monash University                                       |
| 93  | Prof Rebecca Ivers       | The George Institute, University of Sydney              |
| 94  | Dr Wei Xuan              | Ingham Institute for Applied Medical Research           |
| 95  | A/Prof Herwig Drobetz    | Mackay Base Hospital                                    |
| 96  | Prof Zsolt Balogh        | John Hunter Hospital                                    |
| 97  | Dr Manish Gupta          | Nepean Hospital                                         |
| 98  | A/Prof Martin Richardson | Epworth Hospital                                        |
| 99  | Dr Bernard Schick        | Prince of Wales Hospital                                |
| 100 | Dr Ian Incoll            | Gosford and Wyong Hospitals                             |
| 101 | Dr Geoff Smith           | St George and Sutherland Hospitals                      |
| 102 | Mr Ilia Elkinson         | Wellington Hospital                                     |
| 103 | Dr Woosung Kim           | Wellington Hospital                                     |
| 104 | Prof Paul Smith          | Canberra Hospital                                       |
| 105 | Dr Sameer Viswanathan    | Campbelltown Hospital                                   |
| 106 | Prof Mellick Chehade     | Royal Adelaide Hospital                                 |
| 107 | Mr Andrew Oppy           | Royal Melbourne Hospital                                |
| 108 | Dr Kim Latendresse       | Nambour Hospital and Sunshine Coast University Hospital |
| 109 | Dr Jeremy Loveridge      | Cairns Hospital                                         |
| 110 | Mr Phong Tran            | Western Health                                          |
| 111 | Dr Andrew Clout          | Wagga Wagga Base Hospital                               |
| 112 | Dr Jonathan Mulford      | Launceston Hospital                                     |
| 113 | Dr Leo Zeller            | Toowoomba Hospital                                      |
| 114 | Dr Kush Shrestha         | Darwin Hospital                                         |
| 115 | Prof Richard Page        | University Hospital Geelong/Barwon Health               |
| 116 | Dr Stephen Hutchinson    | Royal Hobart Hospital                                   |
| 117 | Dr Kaushik Hazratwala    | Townsville Hospital                                     |
| 118 | Dr Jai Sungaran          | Concord Hospital                                        |

|     |                   |                               |
|-----|-------------------|-------------------------------|
| 119 | Dr Raphael Hau    | Northern Health               |
| 120 | Dr Angus Keogh    | Sir Charles Gairdner Hospital |
| 121 | Prof Pier Yates   | Fiona Stanley Hospital        |
| 122 | Dr Bertram Rieger | Fiona Stanley Hospital        |
| 123 | Dr Roger Bingham  | St Vincent's Hospital         |
| 124 | Dr James Stoney   | St Vincent's Hospital         |
| 125 | Dr Kirsten Howard | University of Sydney          |
| 126 | Dr James Wong     | Westmead Hospital             |

127

## 128 **7. Rationale & background information**

129 *Epidemiology.* Distal radial fractures are the commonest fractures seen in a hospital setting.  
 130 (1) They are particularly common in the elderly due to higher rates of falls and prevalence of  
 131 osteoporosis. In Australia, it is estimated that the number of osteoporotic wrist fractures (in  
 132 people aged 50 years and over) will increase over 25% from approximately 20,000 in 2013  
 133 to over 25,000 in 2022. [16] Direct costs from osteoporotic wrist fractures have been  
 134 estimated to be over \$130 million dollars per year in Australia.[16] With increasing use of  
 135 surgical fixation, the cost is expected to increase disproportionately.[16]

136 *Current practice.* Historically, these fractures have been treated by closed reduction  
 137 (manipulation of the fracture) and plaster cast immobilisation. Over the last 10-20 years, the  
 138 use of internal fixation for these fractures has increased more than 5-fold[17] due to the  
 139 frequent loss of alignment seen with plaster fixation, despite a lack of any clear association  
 140 between alignment and function in this population.[6] In 2011, CIA and CID published the  
 141 results of a survey of Australian orthopaedic surgeons showing that nearly half (47%) of  
 142 surgeons preferred surgical (plate) fixation for the case example used (typical distal radius  
 143 fracture in a 75 year old female).[2] Since that survey, open reduction and volar locked  
 144 plating (a form of internal fixation) has continued to increase in popularity to the extent that it  
 145 is now usual treatment for displaced distal radius fractures in many institutions.

146 *Comparative trials.* Comparative trials have not shown clear superiority of pain and function  
 147 with plate fixation compared to plaster fixation, despite better radiographic appearance with  
 148 operative (plate) fixation.

149 The improved radiographic and clinical alignment noted with surgical (plate) fixation is a  
 150 driver of the preference for surgical fixation amongst surgeons, despite evidence that the

151 residual alignment (or malalignment) is not correlated with pain or function in these  
152 fractures.[18]

153 In 2009, a Cochrane review involving 3,371 mainly elderly female patients concluded that  
154 there was a “lack of clear evidence for the surgical management of these fractures”.[19] The  
155 Cochrane review did not contain any studies comparing plate fixation to closed reduction  
156 and cast immobilisation. Surgery has also been associated with significant complications  
157 otherwise not seen with non-surgical approaches (Table 1).[20,21]

158 In 2011, a high quality randomised controlled trial (RCT) involving 73 participants aged 65  
159 years and older found no difference in patient reported outcomes when volar plating was  
160 compared to plaster fixation for unstable distal radius fractures that had redisplaced after  
161 initial closed reduction.[4] However, this was a single centre study, limiting generalisability,  
162 and it did not report changes in quality of life. Furthermore, this study only included patients  
163 in whom the initial closed reduction had failed on first review, a practice not followed in  
164 Australia, where the decision to operate is made on initial presentation. In many countries,  
165 including Australia, a treatment decision is made on the initial radiographs (degree of  
166 displacement) with no trial of closed treatment first. Therefore, the current study reflects that  
167 practice by randomising based on the initial radiographs. It is the consideration of many  
168 (particularly in Australia and the US) that ‘stability’ is decided on the initial radiographs  
169 (displacement, comminution) and ‘reducibility’ decided on the post-reduction radiographs.

170 In 2014, a second randomised trial involving 185 participants aged 65 years and older also  
171 showed no significant benefit to volar locked plating over closed reduction for displaced  
172 distal radius fractures, but this paper had a high rate of crossover and only included the less  
173 common intra-articular fracture type, making interpretation and generalisation difficult.[22]  
174 These two studies are summarised in Table 2.

175 A third multicentre study investigating volar plate fixation of distal radius fractures in the  
176 elderly is currently recruiting in the US.[23] However, the study group decided not to have a  
177 cast-only group due to the “predictable loss of alignment”, despite a lack of evidence  
178 supporting the popularity and perceived effectiveness of volar plate fixation, which drove the  
179 development of the study. Instead, volar plating is being compared to techniques that are  
180 (by their own admission) no longer in common practice (external fixation and percutaneous  
181 wiring).[24]

182 Table 1. Risks and costs of volar plate fixation (intervention) and cast immobilisation  
183 (control).

| Risks                          | Volar locked plating | Cast immobilisation (ED) |
|--------------------------------|----------------------|--------------------------|
| 1. Infection                   | Yes                  | No                       |
| 2. Need for implant removal    | Yes                  | No                       |
| 3. Tendon rupture / irritation | Yes                  | No                       |

|                                   |                  |                        |
|-----------------------------------|------------------|------------------------|
| 4. Implant failure                | Yes              | No                     |
| 5. Implant migration              | Yes              | No                     |
| 6. Chronic regional pain syndrome | Yes              | Yes                    |
| 7. Wound breakdown                | Yes (dehiscence) | Yes (pressure injury)  |
| 8. Loss of reduction              | Yes (low)        | Yes (high)             |
| Costs                             |                  |                        |
| 1. Implant                        | Yes (\$1,500)    | No                     |
| 2. Theatre costs                  | Yes              | No                     |
| 3. Surgeon / anaesthetists        | Yes              | No                     |
| 4. Inpatient costs (bed)          | Yes (one day)    | No (discharge from ED) |
| 5. Anaesthetic / sedation agents  | Yes              | Yes                    |
| 6. Plaster                        | Yes              | Yes                    |

184

185 *Justification.* Given the increased resource utilisation and risks associated with surgery, a  
186 clear benefit is required to make this treatment cost-effective. No clear benefit to surgery  
187 has yet been established. Our aim is to definitively quantify the true benefit (if any) and  
188 harms of the current standard surgical treatment in Australia, and to determine its cost-  
189 effectiveness, in comparison to closed reduction and cast immobilisation. Our trial will  
190 address the methodological shortcomings of previous trials as outlined in Table 2.

191 Table 2. Comparison of previous RCTs and proposed study, comparing volar plate fixation  
192 to casting for distal radius fractures in the elderly.

|                                                | Arora et al, 2011 | Bartl et al, 2014 | Current study  |
|------------------------------------------------|-------------------|-------------------|----------------|
| All dorsally angulated distal radius fractures | Yes               | No                | Yes            |
| Low crossover                                  | Yes               | No                | N/A            |
| Treatment assigned on initial presentation     | No                | Yes               | Yes            |
| Multicentre                                    | No                | Yes               | Yes            |
| Include general health outcome                 | No                | Yes               | Yes            |
| Country                                        | Austria           | Germany           | Australia / NZ |

193

194 Given the ageing of the Australian population, there will be significant increases in  
195 presentations for distal radius fractures and costs will be significant if usual practice is  
196 surgery. Given the risk associated with surgery, particularly in older people, who are more  
197 prone to comorbidities that may lead to complications and longer hospital stays, there is an  
198 important need for a definitive trial to guide practice, reduce unwarranted practice variation,  
199 optimise health outcomes and justify use of valuable resources. The results of this trial will  
200 not only guide care in Australia and New Zealand but will also have major relevance  
201 internationally.

202

## 203 **8. Study hypothesis**

### 204 Primary hypothesis:

205 Patients aged 60 years and older with displaced fractures of the distal radius managed  
206 operatively using volar locking plate fixation, will have superior patient rated pain and  
207 function at 12 months post-injury compared to those managed non-operatively with closed  
208 reduction and plaster casting.

### 209 Secondary hypotheses

- 210 • There will be a significant difference in complication rates between the two groups
- 211 • There will be a significant difference in cost effectiveness between the two groups

## 212 **9. Aims**

213 Primary Aim: To determine the comparative effectiveness of operative treatment (volar  
214 locking plate fixation) versus non operative treatment (closed reduction and cast  
215 immobilisation) for adults aged 60 years and older with displaced distal radius fractures in a  
216 multicentre randomised controlled trial.

217 Secondary Aims: To determine: comparative safety and cost-effectiveness of operative  
218 treatment versus non operative treatment for adults aged 60 years and older with displaced  
219 distal radius fractures; comparative effectiveness and safety in a parallel prospective  
220 observational study.

## 221 **10. Study design**

222 We will conduct a multicentre randomised controlled trial with an accompanying economic  
223 evaluation, as well as a concurrent prospective observational study including all eligible  
224 patients who decline participation in the trial and will therefore receive standard care (either  
225 plate fixation or closed reduction according to patient preference and usual care for each  
226 institution) and consent to be followed up. All participants will be followed up at the same  
227 time using the same outcomes measures. Surgeons and participants will not be blinded.  
228 The primary outcome (patient reported outcome) will be collected by a blinded assessor.

229 The use of an observational 'preference' arm in addition to the core RCT addresses  
230 criticisms of selection bias in the RCT by following non-randomised patients, and increases  
231 generalisability by following a large cohort of patients receiving the same treatment options  
232 as the RCT, as part of usual care.(3) This study type has been used in surgical trials[26]  
233 and has been recommended as a model for trials of surgery versus non-operative treatment  
234 where recruitment rates are expected to be lower than for other RCTs. [27] Our experience  
235 from our recently completed, similar multicentre fracture trial [28] is that a third of patients



236 accept randomisation with almost 100% of the remainder consenting to be part of the  
237 observational cohort.

## 238 **11. Methods**

### 239 Setting

240 The study will recruit from up to 32 institutions and use 30 site investigators (orthopaedic  
241 surgeons) that have contributed to the protocol and received departmental approval to  
242 recruit for this study, from all surgeons within each department.

### 243 Population

244 The study population will include non-institutionalised individuals aged 60 or older  
245 presenting to participating institutions with a displaced, dorsally angulated distal radius  
246 fracture, within one week of injury.

### 247 Inclusion criteria

- 248 • Age 60 years or older
- 249 • Displaced distal radius fracture (AO/OTA 23A or 23C with more than 10° dorsal  
250 angulation, referenced off a line perpendicular to the shaft of the radius or more than  
251 3mm shortening or more than 2mm articular step) prior to reduction
- 252 • Medically fit for surgery
- 253 • Independent living (including hostel accommodation)
- 254 • Low energy injury (fall from less than 1m)
- 255 • Available for follow up for 12 months

### 256 Exclusion criteria

- 257 • Patient unable to provide consent (due to cognitive capacity or English proficiency)
- 258 • Volar angulation
- 259 • Diaphyseal extension
- 260 • Partial articular fractures eg chauffer, Barton's (AO/OTA 23B)
- 261 • Associated fracture or dislocation in any other body part that will affect the use of  
262 the involved wrist (ulna styloid fracture will be permitted, as these are usually  
263 associated with the fracture under investigation)
- 264 • Open injury
- 265 • Previous wrist fracture on the same side
- 266 • Medical condition precluding anaesthetic

### 267 Recruitment

268 Potential participants will be screened and those eligible will be approached by members of  
269 the orthopaedic team. Eligible patients will be provided with the Participant Information  
270 Sheet, invited to participate and given the opportunity to ask questions. Eligible patients  
271 who are unwilling to be included in the randomised arm of the study will be invited to  
272 participate in the observational arm. Written consent will be obtained prior to inclusion in the  
273 either the randomised or observational arms of the study.

#### 274 Randomisation and treatment allocation concealment

275 Randomisation will occur immediately after consent has been gained by the recruiting  
276 orthopaedic team, within one week of the date of the injury. This will occur by the  
277 orthopaedic team member contacting a central computer-based randomisation service by  
278 telephone. Participants will be randomized using the method of minimisation.  
279 Randomisation will be stratified by site, and minimisation, adjusting for gender and age (60-  
280 74 years and >74 years), will be employed as recommended by the NHMRC Clinical Trials  
281 Centre who will provide the randomisation service. Minimisation (adaptive stratified  
282 sampling) aims to reduce imbalance between the groups on prognostic factors which can  
283 occur despite random allocation of treatment. Here, age and gender will be included in the  
284 minimization algorithm for randomization.

#### 285 Blinding

286 Due to the nature of the comparisons (surgery versus no surgery), it will not be possible to  
287 blind the surgeon (study) investigators or participants. While this may render the trial at risk  
288 of performance and detection bias, every effort will be made to ensure that treatment, other  
289 than the interventions under study is identical in both groups. The primary outcome (PRWE  
290 – patient rated wrist evaluation score at 12 months) will be collected from participants by  
291 blinded researchers, by telephone. The statistician will be blinded to the treatment group.  
292 Participating surgeons have equipoise regarding the two treatment alternatives.

#### 293 Intervention group (plate group)

294 Surgical fixation using a volar locking plate will be performed within two weeks of initial  
295 injury according to usual care of the participating institution, with an orthopaedic surgeon in  
296 attendance. This is a commonly performed procedure. Surgical technique and type of plate  
297 (make and length) will be surgeon preference. A plaster cast may be applied post  
298 operatively but for no longer than two weeks. Active finger movement will be encouraged  
299 post operatively. Participants will be reviewed two weeks (10-17 days) after surgery; the  
300 wound will be reviewed and sutures removed where necessary. Participants will be provided  
301 with a home-exercise program (written information) post-operatively. Referral for outpatient

302 rehabilitation will not be routinely provided but will be permitted. See section below  
303 (“Physiotherapy”) for more information on post-treatment rehabilitation.

#### 304 Control group (cast group)

305 Participants in this group will be treated with a closed reduction and cast immobilisation,  
306 avoiding wrist flexion, within two weeks of the initial injury. This method of casting is  
307 consistent with standard casting practice in Australia. Immobilisation of a DRF in flexion has  
308 been associated with an increased risk of fracture displacement as well as finger and MCPJ  
309 stiffness [29]. Also, immobilisation in a cast that is too restrictive and excessively flexed has  
310 been associated with an increased risk of CRPS [30, 31]. The reduction may be performed  
311 in the Emergency Department under sedation and local anaesthetic infiltration into the  
312 fracture (haematoma block) where possible, but may also be performed in an operating  
313 room (according to availability and local practice). The procedure will be performed by an  
314 orthopaedic surgeon or registrar. Post reduction radiographs will be taken to assess the  
315 fracture alignment after the reduction. The best reduction achievable will be accepted.

316 The cast will be removed at six (+/-one) weeks from the initial reduction. Active finger  
317 movement and light use of the hand will be encouraged immediately. Participants will be  
318 provided with a home-exercise program (written information). Referral for outpatient  
319 rehabilitation will not be routinely provided but will be permitted (as above).

#### 320 Observational arm

321 Patients who do not consent to be randomised will be offered participation in the  
322 observational arm of the study. Their treatment will consist of either closed reduction and  
323 cast immobilisation or operative fixation using a volar locking plate (the same two treatment  
324 options as the RCT arm). Treatment will be decided by patient preference as per usual  
325 practice at each institution. Post-operative treatment protocols, follow up and outcome  
326 measures will be the same as the randomised arms.

#### 327 Physiotherapy

328 A home exercise program (written information) will be provided to all groups. Outpatient  
329 physiotherapy will be allowed according to local practice, but not controlled. This is based  
330 on RCTs and systematic reviews of RCTs that show no benefit, or no sustained (beyond 6  
331 – 12 weeks) clinical benefit from outpatient physiotherapy compared to an unassisted home  
332 program (written information only).[32-36] Attendance at any physical therapy  
333 (physiotherapy, massage, osteopathy etc.) will be recorded at 3 month follow up.

#### 334 Time points

335 Participants will have baseline data collected at the time of consent. Participants will be

336 followed up in person at 1 week (cast group), 2 weeks (plate group), and 6 weeks by the  
337 study surgeons as part of usual care and assessed for complications and radiographic  
338 documentation. Participants will be contacted by telephone by blinded researchers at 3 and  
339 12 months and 2, 5 and 10 years post initial procedure for assessment of study outcomes.

#### 340 Baseline measures

341 Baseline variables will include age, gender, pre-injury difficulty using arm (yes/no), fracture  
342 type (AO/OTA 23A or 23C), radiographic features (see above), diabetes (yes/no), smoking  
343 status (current smoker: yes/no), current glucocorticoid treatment: yes/no, osteoporosis  
344 treatment. Outcome scores (quality of life) and radiographic measures will be recorded at  
345 baseline. We will also collect treatment preference at baseline, as this may have an  
346 independent effect on outcome.

#### 347 Primary outcome

348 Patient Rated Wrist Evaluation (PRWE) [37,38] at twelve (+/-one) months. The PRWE is a  
349 15-item patient-reported measure of pain and function, specific to the wrist. It is a  
350 continuous score on a scale from 0 to 100 with higher scores being worse. It is commonly  
351 used, was developed with patient-input and has been validated for use in patients with  
352 distal radius fractures.

#### 353 Secondary outcomes

- 354 - PRWE at 3 months and 2, 5 and 10 years
- 355 - Disability of the Arm Shoulder and Hand (DASH)[39] at 12 months
- 356 - EQ5D (5L) (Health related quality of life) at 3 and 12 months and 2, 5 and 10 years
- 357 - Pain (numerical rating scale NRS, 0-10) at 3 and 12 months and 2, 5 and 10 years
- 358 - Patient reported treatment success (at 12 months, 5-point Likert scale)
- 359 - Patient rated bother with appearance (at 12 month and 2, 5 and 10 years, 5-point  
360 Likert scale)
- 361 - Complications (including deep infection, reoperation, neuropathy, tendon irritation  
362 requiring treatment, tendon rupture, fracture non-union at minimum 6 months,  
363 implant failure, complex regional pain syndrome, death) at 3 months, 12 months, 2,  
364 5 and 10 years
- 365 - Radiographic measures (shortening [ulnar variance], dorsal angulation, radial tilt,  
366 articular step) measured at presentation, post reduction, and between 6 weeks and  
367 12 months)
- 368 - Therapy utilisation up to and at 3 months

#### 369 Sample size

370 The recent RCT by Arora [4] used a 1:1 allocation, 5% significance and 80% power to  
371 detect a difference of 10 points on the PRWE, calculating a sample size of 68 participants  
372 for both groups. Based on a standard deviation (SD) for the PRWE of 23 in the Arora study,  
373 a 10-point threshold would be less than the commonly used threshold of 0.5SD for a  
374 clinically important difference [40] and less than the MCID of 12 points determined by  
375 Walenkamp [41]. Using a 14 point cut off represents 0.6SD and is in line with another  
376 estimate of the minimum clinically important difference of the PRWE[42]. We consider 14  
377 points to be the minimum clinical difference necessary to justify the additional costs of  
378 surgery compared to non-operative treatment.

379 A total of 128 patients (64 in each group) will provide 90% power to detect a difference of  
380 14 points on the PRWE scale at a significance level of 0.05. We aim to recruit 160 patients  
381 to allow for 20% loss to follow up. The previous RCTs reported loss to follow up rates of  
382 19% [4, 22].

383 The observational arm will be a convenience sample of patients not consenting to  
384 randomisation. In our experience, this group will comprise approximately 2 participants for  
385 every 1 randomised. We will therefore recruit 160 patients into the randomised trial and  
386 approximately 300 patients into the observational arm.

#### 387 Data Collection

388 Primary data collection from site investigators will be paper-based but direct electronic data  
389 entry will also be allowed. Participant follow up will be by telephone, but the option of  
390 electronic data capture by participants (incorporating electronic reminders) will be available.

#### 391 Analysis

392 The primary outcome is the PRWE score at 12 months. An analysis of covariance will be  
393 used to compare the mean PRWE between the two independent groups. Intention to treat  
394 analysis will be performed in the primary analysis. A per-protocol analysis (including  
395 participants according to treatment received) will be added as a secondary analysis.

396 Analysis of secondary outcomes will include mixed model analyses, comparing secondary  
397 outcomes between timepoints. Non-operative treatment will be defined as a minimum of 28  
398 days in the plaster splint for the purposes of the per-protocol analysis.

399 The observational arm will be analysed separately, comparing the same two treatment  
400 groups against the same outcomes using multivariable linear regression to adjust for  
401 potential confounders. Results from both arms of the study will be analysed, comparing the  
402 randomised groups with the observational groups.

403 Repeated measures analysis will be performed as a secondary analysis.

404 Attempts will be made to minimise missing data, such as obtaining multiple contact details  
405 at recruitment and using telephone follow up rather than mail. Missing data will be dealt with  
406 according to the instructions on the use of the outcome tools (PRWE, DASH and EQ-5D-  
407 5L). If greater than ten percent of data is missing from the randomised sample, then  
408 missing data will be imputed..

#### 409 Cost-effectiveness

410 The costs of both treatment arms, and health service utilisation will be calculated for the  
411 cost-effectiveness analysis. A cost effectiveness analysis will be performed from the  
412 hospital perspective and a health care funder perspective, and limited to clearly defined,  
413 major costs. Costs will be calculated from: 1. Length of stay (if admitted), 2. Theatre costs  
414 (based on standard fees for public hospitals in each state), 3. Implant costs, and 4.  
415 Outpatient rehabilitation related costs. Using the mean costs and the mean health  
416 outcomes in each trial arm, the incremental cost per QALY of the plate group compared  
417 with cast group will be calculated; results will be plotted on a cost-effectiveness plane.  
418 Bootstrapping will be used to estimate a distribution around costs and health outcomes, and  
419 to calculate the confidence intervals around the incremental cost-effectiveness ratios. One-  
420 way sensitivity analysis will be conducted around key variables and a probabilistic  
421 sensitivity analysis to estimate the joint uncertainty in all parameters. A cost-effectiveness  
422 acceptability curve (CEAC) will be plotted to provide information about the probability that  
423 the intervention is cost-effective, given willingness to pay for each additional QALY gained.

#### 424 Crossover

425 The cosmetic difference between non-operative treatment (which commonly results in a  
426 visible deformity) and plate fixation (which rarely results in a visible deformity) may be a  
427 reason for participants in the non-operative group to cross over. This was not reported to be  
428 an issue in the RCT by Arora et al, but was a significant issue in the RCT by Bartl et al, with  
429 nearly 50% crossover from non-operative to operative treatment prior to the primary  
430 endpoint. However, this was due to surgeon preference based on radiographic appearance.  
431 In order to minimise this, the importance of avoiding crossover prior to the primary endpoint  
432 will be emphasised with the participating surgeons, and participants will be informed of the  
433 likely residual deformity, but reassured (in the participant information sheet) that residual  
434 deformity is usually well tolerated and is not associated with functional loss or pain. The  
435 participating surgeons understand the importance of equipoise and have agreed to  
436 participate based on their equipoise and the understanding that cosmetic appearance is not  
437 an indication for crossover.

#### 438 Stopping rules / interim analysis:

439 There will be no interim analysis due to the low risk of adverse events compared to usual  
440 care, as both treatment groups constitute reasonable and common practice. Adverse  
441 events will be reported to the administering institution and project manager. These will be  
442 defined as outlined below and are included in the reported complications listed above  
443 (secondary outcomes).

## 444 **12. Safety Considerations**

445 The study compares two treatments that comprise usual care. It is not anticipated that either  
446 treatment arm will be associated with adverse events above and beyond what is  
447 experienced normally with these therapies. An independent data safety monitoring board  
448 (DSMB) will be established, however, at the commencement of the trial. The board will  
449 convene four months after trial commencement to review study progress and, where  
450 appropriate, provide advice on issues regarding the scientific aspects of study conduct  
451 (eligibility, recruitment rates, compliance) and any emerging evidence as it relates to the  
452 trial. The DSMB will reconvene subsequently to review progress if any recommendations  
453 were made after the initial review. If not, the DSMB will only meet as required; that is, if any  
454 adverse event (defined below) occurs. The DSMB will be required to decide whether the  
455 adverse event is related to the trial interventions or not. If there appears to be an atypical  
456 trend in adverse events, trial suspension will be considered. This DSMB will comprise three  
457 members who are not investigators (an orthopedic surgeon, a physical therapist, and a  
458 statistician /epidemiologist), as well as one investigator.

459 Adverse events will be defined as:

- 460 • Symptomatic fracture non-union (3 of 4 cortices not united radiographically at minimum  
461 6 months)
- 462 • infection (local infection requiring any treatment)
- 463 • neuropathy
- 464 • tendon irritation (requiring treatment)
- 465 • tendon rupture
- 466 • Complex regional pain syndrome (diagnosed on basis of presence of dysaesthetic pain,  
467 hyperaesthesia extending into the hand of the injured limb, vasomotor changes, skin  
468 atrophy, and diffuse osteopenia)

469 Site agreements include provisions for liability and insurance, requiring each site to maintain  
470 insurance for indemnity relating to activities in the conduct of the study. Participants are  
471 informed in the patient information and consent form as to what they should do if they suffer  
472 any injuries or complications as a result of participation in the study.

473

474 **13. Data management**

475 Data will be collected by local site investigators and study documents will be submitted  
476 securely (scanned and emailed) to the project manager at the administering institution.  
477 Data will be stored in password protected computers and locked filing cabinets within the  
478 administering institution.

479

480 **14. Ethical considerations**

481 The study will be submitted to a lead ethics committee in NSW for initial ethical  
482 consideration. Relevant ethics approval from each site will also be necessary if not covered  
483 by the original NEAF, together with site-specific approvals.

484 The study will be registered prior to trial commencement at ANZ Clinical Trials Registry and  
485 the protocol will be published, in accordance with The SPIRIT Statement [46,47]. Reporting  
486 will be according to The CONSORT Statement [48].

487 The study satisfies the requirements of the National Statement on Ethical Conduct in  
488 Human Research (updated March 2014). No financial or other competing interests have  
489 been identified or declared.

490 The investigators consider randomised trials of operative versus non-operative treatment to  
491 be ethical, provided that the requirements of ethical research have been satisfied, and the  
492 potential benefits of the study to society outweigh the potential risks to individuals involved  
493 in the study. Two of the investigators have previously published on ethics in surgical  
494 research.[49,50] As operative treatment is currently the most common treatment, we see no  
495 increased harm from surgery than would exist without the presence of the study.

496 In this case, we consider the risks of continued operative treatment of distal radius fractures  
497 without supporting evidence of a clinical advantage over non-operative treatment to be  
498 unjustified. Risks associated with this study are the risks associated with each of the  
499 treatments.

500 Participants will not be paid. Institutions will receive \$250 reimbursement per participant for  
501 the randomised group and \$100 per participant for patients declining randomisation (who  
502 will be offered inclusion in the observational cohort) to compensate for the time given by  
503 local research support staff in recruitment and data collection.

504 **15. Peer review**



505 The study has wide support from clinicians as evident from the participating centres; it was  
506 presented at the annual meeting of the Australasian Orthopaedic Trauma Society in  
507 Melbourne in October 2014 and drafts of the protocol were sent to members prior to the  
508 meeting. Further revisions have occurred after dissemination between study group  
509 members, including orthopaedic clinicians, statisticians and methodologists. The study  
510 protocol was presented at the 2016 ANZMUSC Scientific Meeting and received  
511 endorsement from the group. The investigators have published previous RCTs and surgical  
512 outcome studies, including studies of distal radius fractures.[2,40,41].

### 513 **16. Feasibility**

514 The administering institution and many of the included researchers performed the  
515 CROSSBAT multicentre ankle fracture trial (clinicaltrials.gov, NCT01134094) that has  
516 recently been completed, having recruiting approximately 450 patients from over 24 centres  
517 within 3 years, using funding from an Australian Orthopaedic Association grant. The  
518 administering institution and the CIs have extensive expertise and experience in performing  
519 and publishing multicentre randomised trials in orthopaedics. A Clinical Trials Coordinator  
520 housed at the Whitlam Orthopaedic Research Centre (WORC), within the Ingham Institute  
521 for Applied Medical Research will be assigned to this project.

### 522 **17. Expected outcomes**

523 The study will provide definitive evidence of the comparative effectiveness, safety and cost-  
524 effectiveness of two different but commonly used treatment options for this common  
525 fracture.

526 If the study finds that operative treatment (plating) is not superior to non-operative treatment  
527 (casting), it will strengthen the existing evidence for non-operative treatment for these  
528 fractures and therefore influence and change clinical practice.

529 If the study finds plating to be superior, and it is found to be cost-effective, it will provide  
530 high quality evidence to support the current practice of plate fixation.

531 Involvement of local surgeons is more likely to lead to acceptance of the results and  
532 facilitate early practice change within Australia and New Zealand. Inclusion of an  
533 observational arm will also increase the generalisability of the results by including non-  
534 randomised patients treated with the same interventions. Due to the frequency and impact  
535 of this fracture, and continued contention over the treatment options internationally, the  
536 results of this trial will have impact on fracture treatment globally.

537

### 538 **18. Dissemination of results and publication policy**

539 The protocol will be published in an open access journal.

540 The results of the study will be presented at national and international orthopaedic scientific  
541 meetings such as the Australian Orthopaedic Association (AOA) Annual Scientific Meeting  
542 and the American Academy of Orthopaedic Surgeons Annual Scientific Meeting. Results  
543 will be published in a high impact general medical or surgical journal and will be  
544 disseminated via various forms of media. The results of the trial will be incorporated in  
545 clinical recommendations and practice guidelines produced by local professional bodies  
546 such as the AOA, and government bodies such as the Agency for Clinical Innovation  
547 (NSW) and similar interstate bodies. A medical education program will include direct  
548 feedback of the results to participating institutions, including orthopaedic departments,  
549 emergency departments, general practitioners and physiotherapists. Direct patient targeting  
550 will be performed by producing patient information sheets available in the emergency  
551 department.

552 Authorship will be under the name of “The CROSSFIRE Study Group”. This group will  
553 comprise all investigators, including at least one investigator from each contributing  
554 institution.

555 Aggregated, deidentified results will also be made available to participants and participating  
556 institutions via the study website, accessed via the WORC website.

557 The de-identified participant-level dataset and statistical code will be made available for  
558 collaborative research projects.

559

560 **19. Duration of the project / timeline**

561 Ethics approval and site preparation will take approximately 9 months. Recruitment is  
562 expected to take 12 months. Data cleaning, analysis and manuscript preparation will take 6  
563 months. The study will take 4 years from initiation to manuscript submission. Table 3  
564 provides a timeline for the study.

565

566 Table 3. Study timeline (periods in months [m])

|                  | 0-6m | 7-12m | 13-18m | 19-24m | 25-30m | 31-36m | 37-42m | 43-48m |
|------------------|------|-------|--------|--------|--------|--------|--------|--------|
| Ethics approval  | X    |       |        |        |        |        |        |        |
| Site preparation | X    | X     |        |        |        |        |        |        |
| Recruitment      |      | X     | X      | X      |        |        |        |        |
| Follow up        |      | X     | X      | X      | X      | X      |        |        |
| Analysis         |      |       |        |        |        | X      | X      |        |
| Dissemination    |      |       |        |        |        |        | X      | X      |

567 Data pertaining to 2, 5 and 10 year follow-up will be analysed and published in separate  
568 studies.

## 569 **20. Anticipated problems**

570 Slow recruitment due to local site issues, poor acceptance by potential participants, and  
571 greater than expected rates of exclusion criteria (e.g., cognitive state, language proficiency)  
572 may prolong the study. This can be addressed by the addition of more sites or prolonging  
573 the recruitment period. This is a common fracture, and we have previously achieved high  
574 participation rates. In a similar trial of operative versus non-operative treatment of ankle  
575 fractures (clinicaltrials.gov, NCT01134094) from a similar number of sites (24 versus 27 for  
576 this study) we were able to recruit 440 patients over 3 years, for a fracture that is less  
577 common than distal radius fractures in the elderly. With the sample size of 145 and 27 sites  
578 recruiting for six months, each site would need to recruit one patient per month. Each  
579 institution would treat 2-5 such cases per week.

580 Interest in the study will be maintained by regular contact from the administering institution  
581 through monthly newsletters and updates by email, and telephone contact and site visits as  
582 required.

## 583 **21. Project management**

584 A project manager will be assigned to oversee the day-to-day management of the study  
585 including liaising with local sites and ensuring complete data collection at each time point  
586 for each study participant.

587 Overall supervision of the project will be from the CROSSFIRE Study Group (all  
588 investigators listed above) who will maintain email contact and have regular teleconference  
589 meetings (bimonthly). Monthly progress emails will be distributed to all investigators.  
590 Members will also meet for face-to-face meetings twice per year.

### 591 Significance

592 The study will provide definitive evidence of the comparative effectiveness, safety and cost-  
593 effectiveness of two different but commonly used treatment options for this common  
594 fracture.

595 If the study finds that operative treatment (plating) is not superior to non-operative treatment  
596 (casting), it will strengthen the existing evidence for non-operative treatment for these  
597 fractures and therefore influence and change clinical practice. If the study finds plating to be  
598 superior, and it is found to be cost-effective, it will provide high quality evidence to support  
599 the current practice of plate fixation.

600 Involvement of local surgeons is more likely to lead to acceptance of the results and  
601 facilitate early practice change within Australia and New Zealand. Inclusion of an  
602 observational arm will also increase the generalisability of the results by including non-  
603 randomised patients treated with the same interventions. Due to the frequency and impact  
604 of this fracture, and continued contention over the treatment options internationally, the  
605 results of this trial will have impact on fracture treatment globally.

606

## 607 **22. References**

608

- 609 1. Nellans, K.W., E. Kowalski, and K.C. Chung, The Epidemiology of Distal Radius  
610 Fractures. *Hand clinics*, 2012. 28(2): 113-125.
- 611 2. Ansari, U., et al., Practice variation in common fracture presentations: a survey of  
612 orthopaedic surgeons. *Injury*, 2011. 42(4): 403-7.
- 613 3. Chan, Y.H., et al., Comparison between cast immobilization versus volar locking plate  
614 fixation of distal radius fractures in active elderly patients, the Asian perspective. *Hand*  
615 *Surg*, 2014. 19: 19-23.
- 616 4. Arora, R., et al., A prospective randomized trial comparing nonoperative treatment with  
617 volar locking plate fixation for displaced and unstable distal radial fractures in patients sixty-  
618 five years of age and older. *J Bone Jt Surg (Am)*, 2011. 93(23): 2146-53.
- 619 5. Belloti, J.C., et al., Treatment of reducible unstable fractures of the distal radius in adults:  
620 a randomised controlled trial of De Palma percutaneous pinning versus bridging external  
621 fixation. *BMC Musculoskeletal Disorders*, 2010. 11: 137.
- 622 6. Diaz-Garcia, R.J. and K.C. Chung, Common Myths and Evidence in the Management of  
623 Distal Radius Fractures. *Hand Clinics*, 2012. 28(2): 127-133.
- 624 7. Egol, K., et al., Bridging external fixation and supplementary Kirschner-wire fixation  
625 versus volar locked plating for unstable fractures of the distal radius: a randomised,  
626 prospective trial. *J Bone Jt Surg (Br)*, 2008. 90(9): 1214-21.
- 627 8. Egol, K.A., et al. ORIF vs external fixation for distal radial fractures: a randomized  
628 prospective trial. in *American Academy of Orthopaedic Surgeons Annual Meeting*. 2007.  
629 San Diego, California.
- 630 9. Egol, K.A., et al., Distal radial fractures in the elderly: operative compared with  
631 nonoperative treatment. *J Bone Jt Surg (Am)*, 2010. 92A(9): p. 1851-7.
- 632 10. Gradl, G., et al., Non-bridging external fixation employing multiplanar K-wires versus  
633 volar locked plating for dorsally displaced fractures of the distal radius. *Arch Orthop Traum*  
634 *Su*, 2013. 133(5): 595-602.

- 635 11. Grewal, R., et al., Open reduction internal fixation versus percutaneous pinning with  
636 external fixation of distal radius fractures: a prospective, randomized clinical trial. *J Hand*  
637 *Surg (Am)*, 2011. 36(12): 1899-906.
- 638 12. Harley, B.J., et al., Augmented external fixation versus percutaneous pinning and  
639 casting for unstable fractures of the distal radius--a prospective randomized trial. *J Hand*  
640 *Surg (Am)*, 2004. 29(5): 815-24.
- 641 13. Kreder, H.J., et al., A randomized, controlled trial of distal radius fractures with  
642 metaphyseal displacement but without joint incongruity: closed reduction and casting  
643 versus closed reduction, spanning external fixation, and optional percutaneous K-wires. *J*  
644 *Orthop Trauma*, 2006. 20: 115-21.
- 645 14. Margaloit, Z., et al., A meta-analysis of outcomes of external fixation versus plate  
646 osteosynthesis for unstable distal radius fractures. *J Hand Surg (Am)*, 2005. 30(6):  
647 1185.e1-17.
- 648 15. Young, C.F., A.M. Nanu, and R.G. Checketts, Seven-year outcome following Colles'  
649 type distal radial fracture. A comparison of two treatment methods. *J Hand Surg (Br)*, 2003.  
650 28(5): 422-6.
- 651 16. Watts, J.J., J. Abimanyi-Ochom, and K.M. Sanders, Osteoporosis costing all  
652 Australians. A new burden of disease analysis - 2012 to 2022. 2013, Osteoporosis  
653 Australia: Sydney.
- 654 17. Chung, K.C., M.J. Shauver, and J.D. Birkmeyer, Trends in the United States in the  
655 treatment of distal radial fractures in the elderly. *J Bone Joint Surg (Am)*, 2009. 91(8): 1868-  
656 73.
- 657 18. Synn, A.J., et al., Distal radius fractures in older patients: is anatomic reduction  
658 necessary? *Clin Orthop Relat Res*, 2009. 467(6): 1612-20.
- 659 19. Handoll, H.H. and R. Madhok, Surgical interventions for treating distal radial fractures in  
660 adults. *Cochrane Database Syst Rev*, 2009(3): CD003209.
- 661 20. Arora, R., et al., Complications following internal fixation of unstable distal radius  
662 fracture with a palmar locking-plate. *J Orthop Trauma*, 2007. 21(5): 316-22.
- 663 21. Berglund, L.M. and T.M. Messer, Complications of Volar Plate Fixation for Managing  
664 Distal Radius Fractures. *J Am Acad Orthop Surg*, 2009. 17(6): 369-377.
- 665 22. Bartl, C., Stengel, D., Bruckner, T., Gebhard, F., The Treatment of Displaced Intra-  
666 articular Distal Radius Fractures in Elderly Patients: A Randomized Multi-center Study  
667 (ORCHID) of Open Reduction and Volar Locking Plate Fixation Versus Closed Reduction  
668 and Cast Immobilization. *Dtsch Arztebl International*, 2014. 111(46): 779-87.
- 669 23. Chung, K.C., J.W. Song, and W.s. group, A Guide on Organizing a Multicenter Clinical  
670 Trial: the WRIST study group. *Plast Reconstr Surg*, 2010. 126(2): 515-523.

- 671 24. Wrist Radius Injury Surgical Trial Study Group Study, G., Reflections One Year into the  
672 22 Center NIH-funded WRIST Study. A Primer on Conducting a Multicenter Clinical Trial. *J*  
673 *Hand Surg*, 2013. 38(6): 1194-1201.
- 674 25. Torgerson, D.J. and B. Sibbald, Understanding controlled trials. What is a patient  
675 preference trial? *BMJ*, 1998. 316(7128): 360.
- 676 26. Grant, A.M., et al., Minimal access surgery compared with medical management for  
677 chronic gastro-oesophageal reflux disease: UK collaborative randomised trial. *BMJ*, 2008.  
678 337: a2664.
- 679 27. Blazeby, J.M., C.P. Barham, and J.L. Donovan, Commentary: Randomised trials of  
680 surgical and non-surgical treatment: a role model for the future. *BMJ*, 2008. 337: a2747.
- 681 28. Mittal R, Harris IA, Adie S for the CROSSBAT Study Group, et al Surgery for Type B  
682 Ankle Fracture Treatment: a Combined Randomised and Observational Study  
683 (CROSSBAT) *BMJ Open* 2017;7:e013298. doi: 10.1136/bmjopen-2016-013298
- 684 29. Gupta A. The treatment of Colles' fracture. Immobilisation with the wrist dorsiflexed. *J*  
685 *Bone Joint Surg Br*. 1991 Mar; 73(2): 312-5.
- 686 30. Raskin K and Weinstok T. Management of fractures of the distal radius. *J Hand Ther*  
687 1999; April–June: 93–103.
- 688 31. Gillespie, S., Cowell, F., Cheung, G., Brown, D., Can we reduce the incidence of  
689 complex regional pain syndrome type I in distal radius fractures? The Liverpool experience.  
690 *Hand Therapy*, Vol 21, Issue 4, 2016
- 691 32. Handoll, H.H., R. madhock, and T.E. Howe, Rehabilitation for distal radial fractures in  
692 adults. *Cochrane Database of Systematic Reviews*, 2006. 3.
- 693 33. Lozano-Calderón, S.A., et al., Wrist Mobilization Following Volar Plate Fixation of  
694 Fractures of the Distal Part of the Radius. *J Bone Jt Surge (Am)*, 2008. 90: 1297-1304.
- 695 34. Wakefield, A.E. and M.M. McQueen, The role of physiotherapy and clinical predictors of  
696 outcome after fracture of the distal radius. *J Bone Joint Surg Br*, 2000. 82(7): 972-6.
- 697 35. Krischak, G.D., et al., Physiotherapy after volar plating of wrist fractures is effective  
698 using a home exercise program. *Arch Phys Med Rehabil*, 2009. 90(4): 537-44.
- 699 36. Watt, C.F., N.F. Taylor, and K. Baskus, Do Colles' fracture patients benefit from routine  
700 referral to physiotherapy following cast removal? *Arch Orthop Trauma Surg*, 2000.  
701 120(7):413-5.
- 702 37. MacDermid, J.C., et al., Responsiveness of the short form-36, disability of the arm,  
703 shoulder, and hand questionnaire, patient-rated wrist evaluation, and physical impairment  
704 measurements in evaluating recovery after a distal radius fracture. *J Hand Surg Am*, 2000.  
705 25(2): 330-40.
- 706 38. MacDermid, J.C., et al., Patient rating of wrist pain and disability: a reliable and valid  
707 measurement tool. *J Orthop Trauma*, 1998. 12(8): 577-86.

708 39. Hudak, P.L., P.C. Amadio, and C. Bombardier, Development of an upper extremity  
709 outcome measure: the DASH (disabilities of the arm, shoulder and hand) [corrected]. The  
710 Upper Extremity Collaborative Group (UECG). *Am J Ind Med*, 1996. 29(6): 602-8.

711 40. Norman, G.R., J.A. Sloan, and K.W. Wyrwich, Interpretation of changes in health-related  
712 quality of life: the remarkable universality of half a standard deviation. *Med Care*, 2003.  
713 41(5): 582-92.

714 41. Walenkamp, M.M.J., et al., The Minimum Clinically Important Difference of the Patient-  
715 rated Wrist Evaluation Score for Patients With Distal Radius Fractures. *Clin Orthop Relat*  
716 *Res* (2015) 473:3235–3241.

717 42. Sorensen, A.A., et al., Minimal clinically important differences of 3 patient-rated  
718 outcomes instruments. *J Hand Surg Am*, 2013. 38(4): 641-9.

719 43. Schmitt, J.S. and R.P. Di Fabio, Reliable change and minimum important difference  
720 (MID) proportions facilitated group responsiveness comparisons using individual threshold  
721 criteria. *J Clin Epidemiol*, 2004. 57(10): 1008-18.

722 44. Jupiter, J.B., M. Marent-Huber, and L.C.P.S. Group, Operative management of distal  
723 radial fractures with 2.4-millimeter locking plates. A multicenter prospective case series. *J*  
724 *Bone Joint Surg Am*, 2009. 91(1): 55-65.

725 45. Drobetz, H. and E. Kutscha-Lissberg, Osteosynthesis of distal radial fractures with a  
726 volar locking screw plate system. *Int Orthop*, 2003. 27(1): 1-6.

727 46. Chan A-W, Tetzlaff JM, Altman DG, Laupacis A, Gøtzsche PC, Krleža-Jerić K,  
728 Hróbjartsson A, Mann H, Dickersin K, Berlin J, Doré C, Parulekar W, Summerskill W,  
729 Groves T, Schulz K, Sox H, Rockhold FW, Rennie D, Moher D. SPIRIT 2013 Statement:  
730 Defining standard protocol items for clinical trials. *Ann Intern Med* 2013;158:200-207.

731 47. Chan A-W, Tetzlaff JM, Gøtzsche PC, Altman DG, Mann H, Berlin J, Dickersin K,  
732 Hróbjartsson A, Schulz KF, Parulekar WR, Krleža-Jerić K, Laupacis A, Moher D. SPIRIT  
733 2013 Explanation and Elaboration: Guidance for protocols of clinical trials. *BMJ*  
734 2013;346:e7586.

735 48. Schulz KF, Altman DG, Moher D, for the CONSORT Group. CONSORT 2010  
736 Statement: updated guidelines for reporting parallel group randomised trials. *BMJ*  
737 2010;340:c332.

738 49. Harris, I.A. and J.M. Naylor, Double standards in clinical practice ethics. *Med J Aust*,  
739 2014. 200(2): 76.

740 50. Kishen, T.J., I.A. Harris, and A.D. Diwan, Primum non nocere and randomised placebo-  
741 controlled surgical trials: a dilemma? *ANZ J Surg*, 2009. 79(7-8): 508-9.

742
